# Supplementary material for: Itaconic Acid Cross-Linked Biomolecule Immobilization Approach on Amine-Functionalized Silica Nanoparticles for Highly Sensitive Enzyme-Linked Immunosorbent Assay (ELISA)
Source: PubMed Central journal article supplement — ACS Omega. 2024 Feb 23;9(12):13636–43. doi: 10.1021/acsomega.3c07548 (PMC10975634; doi:10.1021/acsomega.3c07548), 2024-02-23
Supplement: ao3c07548_si_001.pdf [file ao3c07548_si_001.pdf]

## *Supporting Information (SI)*

# Itaconic acid – crosslinked biomolecule immobilization approach on amine-functionalized silica nanoparticles for highly sensitive enzyme-linked immunosorbent assay (ELISA)

*Suruk Udomsom<sup>a,b,†</sup>, Kritsana Kanthasap<sup>a,b,†</sup>, Pathinan Paengnakorn<sup>a,b</sup>, Pensak Jantrawut<sup>c</sup>,*

*Sarawut Kumphune<sup>a,b</sup>, Sansanee Auephanwiriyaikul<sup>a,b,d</sup>, Ukrit Mankong<sup>b,c</sup>, Nipon Theera-*

*Umpon<sup>a,b,e</sup>, Phornsawat Baipaywad<sup>a,b,\*</sup>*

<sup>a</sup> Biomedical Engineering Institute, Chiang Mai University, Chiang Mai 50200, Thailand. Email:

phornsawat.b@cmu.ac.th

<sup>b</sup> Biomedical Engineering and Innovation Research Center, Chiang Mai University, Chiang Mai,

Chiang Mai, 50200 Thailand

<sup>c</sup> Department of Pharmaceutical Sciences, Faculty of Pharmacy, Chiang Mai University, Chiang

Mai 50200, Thailand

<sup>d</sup> Department of Computer Engineering, Faculty of Engineering, Chiang Mai University, Chiang

Mai 50200, Thailand

<sup>e</sup> Department of Electrical Engineering, Faculty of Engineering, Chiang Mai University, Chiang

Mai 50200, Thailand

<sup>†</sup> These authors contribute equally to this work.

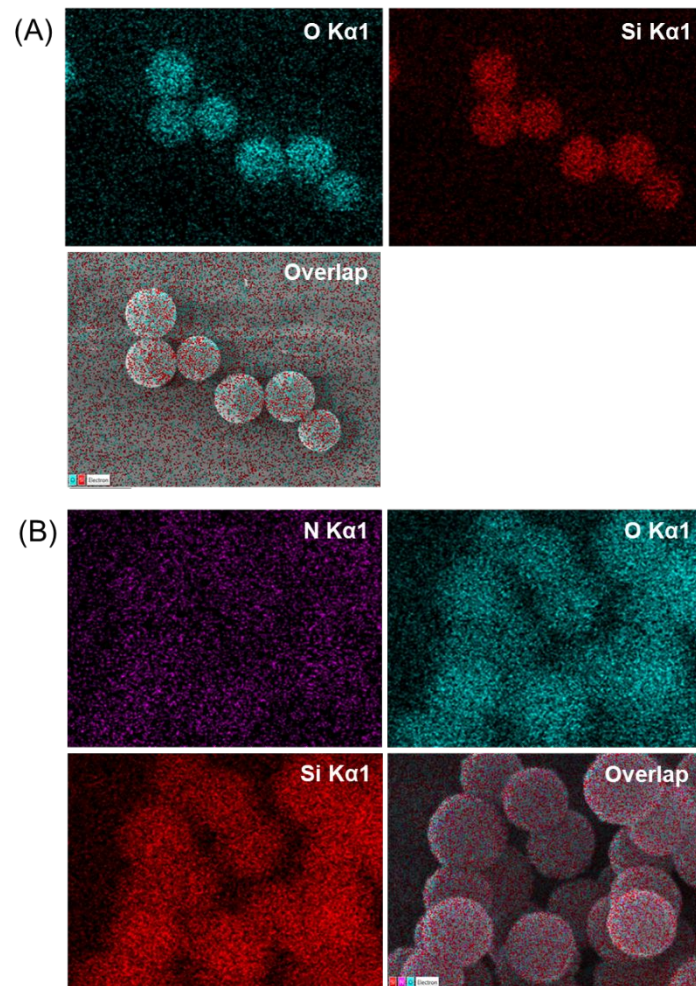

**Figure S1.** EDS mapping images of SNPs (A) and AFSNPs (B), corresponding to O-K, Si-K, and N-K of the particles.

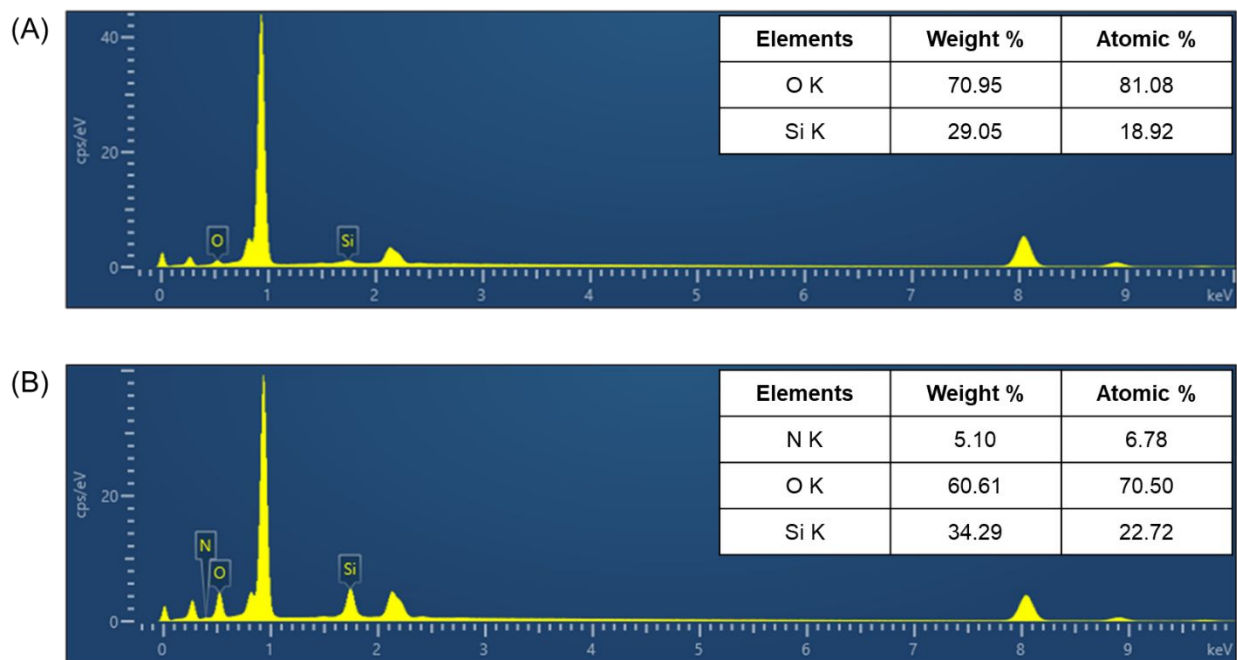

**Figure S2.** EDS spectrum of (A) SNPs and (B) AFSNPs (inset table: atomic % and weight % of elements).

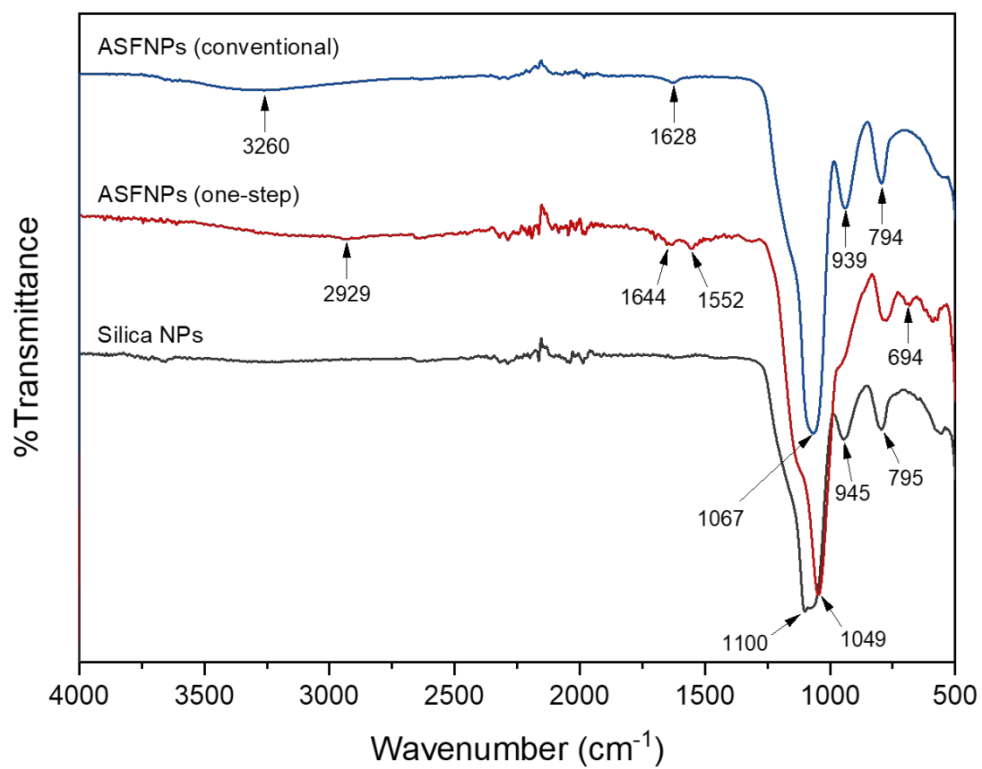

**Figure S3.** FTIR spectra of SNPs and AFSNPs (synthesized by different methods).

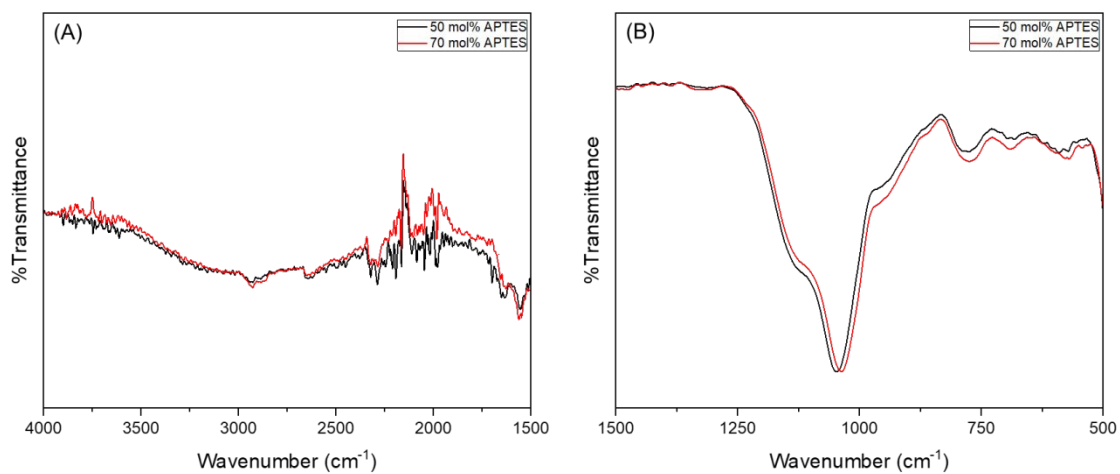

**Figure S4.** FTIR spectra of AFSNPs with different concentration of APTES (prepared by one-step method); wavenumber (A) 1500 – 4000  $\text{cm}^{-1}$  and (b) 500 – 1500  $\text{cm}^{-1}$ .
